# Supplementary material
Source: MDPI journal article supplement (https://www.mdpi.com/2227-9717/10/11/2235)
Supplement: s1 [file s1]

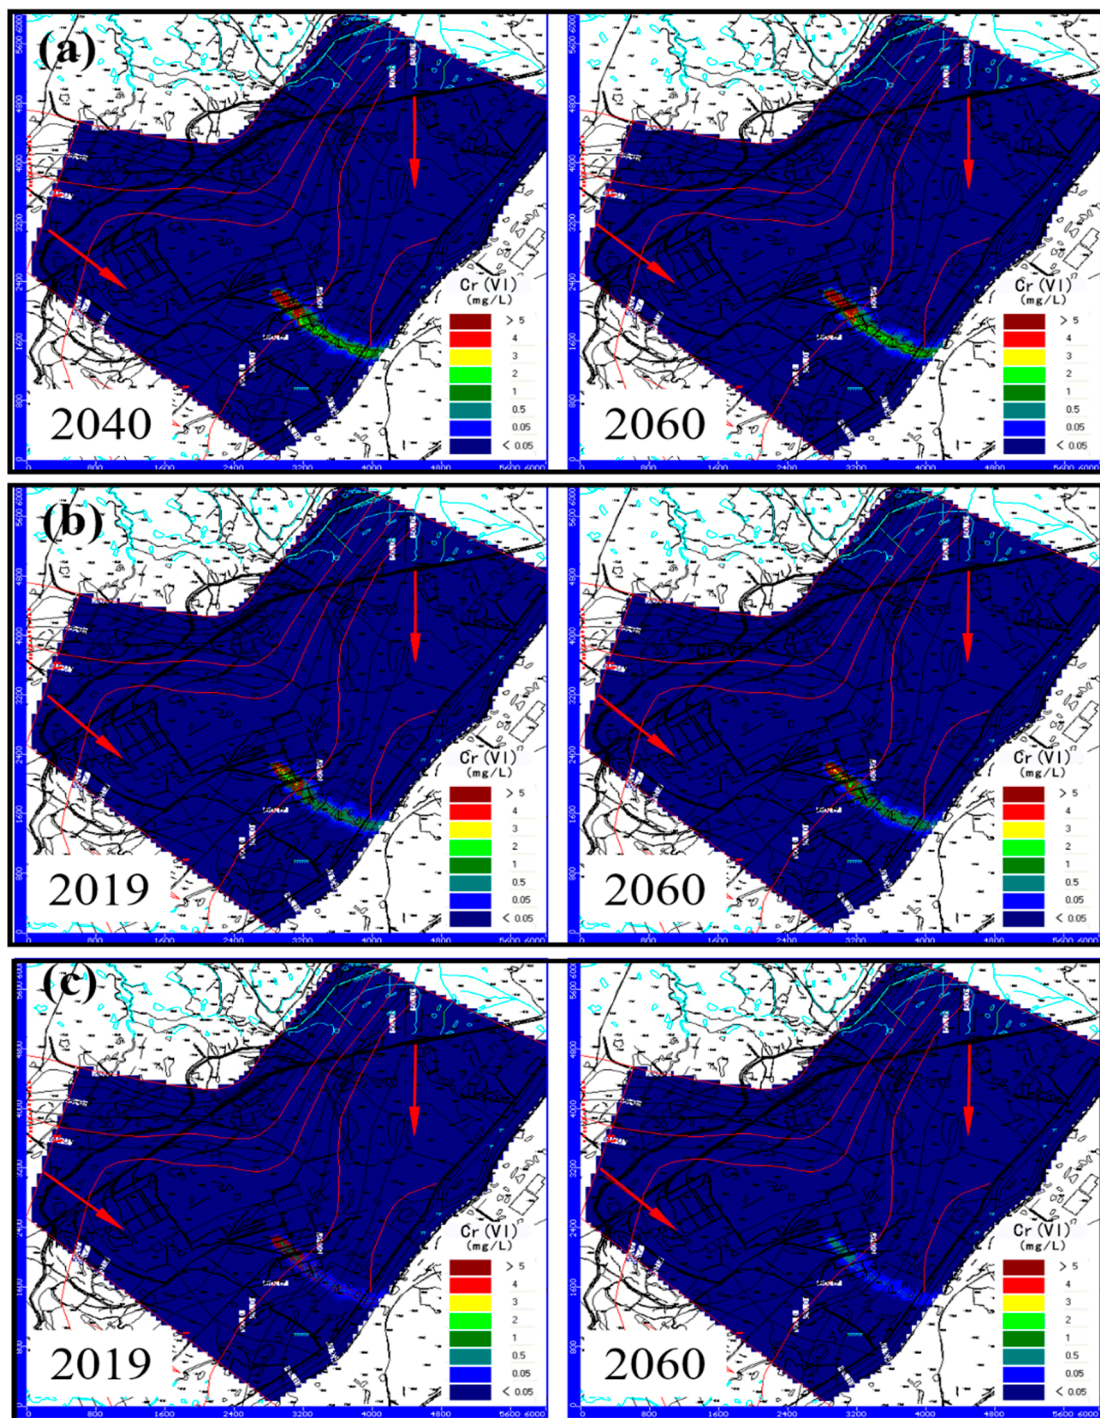

**Figure S1.** Simulation results for Cr(VI) in groundwater under three scenarios: (a) untreated slag (scenario I), (b) 50% slag treatment (scenario II), and (c) 100% slag treatment (scenario III)
